# Supplementary material for: The SIGMA rat brain templates and atlases for multimodal MRI data analysis and visualization
Source: PubMed Central journal article supplement (PMC6911097; doi:10.1038/s41467-019-13575-7), 2019-12-13
Supplement: 41467_2019_13575_MOESM1_ESM.pdf [file 41467_2019_13575_MOESM1_ESM.pdf]

# The SIGMA rat brain templates and atlases for multimodal MRI data analysis and visualization

D.A. Barrière<sup>1,2,3,†</sup>, R. Magalhães<sup>1,2,4,5,†</sup>, A. Novais<sup>4,5</sup>, P. Marques<sup>4,5</sup>, E. Selingue<sup>1,2</sup>,  
F. Geffroy<sup>1,2</sup>, F. Marques<sup>4,5</sup>, J. Cerqueira<sup>4,5</sup>, J.C. Sousa<sup>4,5</sup>, F. Boumezbeur<sup>1,2</sup>,  
M. Bottlaender<sup>1,2</sup>, T.M. Jay<sup>3,6,7</sup>, A. Cachia<sup>3,6,8,9</sup>, N. Sousa<sup>4,5,\*\*</sup>, S. Mériaux<sup>1,2,\*</sup>

<sup>1</sup>NeuroSpin, Institut des Sciences du Vivant Frédéric Joliot, Commissariat à l'Énergie Atomique et aux Énergies Alternatives, 91191 Gif-Sur-Yvette, France.

<sup>2</sup>Université Paris-Saclay, 91191 Gif-Sur-Yvette, France

<sup>3</sup>Physiopathologie des Maladies Psychiatriques, UMR\_S 894 Inserm, Centre de Psychiatrie et Neurosciences, 75014 Paris, France.

<sup>4</sup>Life And Health Sciences Research Institute (ICVS), School of Medicine, University of Minho, 4710-057 Braga, Portugal.

<sup>5</sup>ICVS/3B's, PT Government Associate Laboratory, Braga/Guimarães, Portugal.

<sup>6</sup>Université Paris Descartes, Sorbonne Paris Cité, 75006 Paris, France.

<sup>7</sup>Faculté De Médecine Paris Descartes, Service Hospitalo-Universitaire, Centre Hospitalier Sainte Anne, 75014 Paris, France.

<sup>8</sup>Laboratoire de Psychologie du Développement et de l'Éducation de l'Enfant, CNRS UMR 8240, 75014 Paris, France.

<sup>9</sup>Institut Universitaire de France, 75005 Paris, France

**\* Corresponding author:** Dr. Sébastien Mériaux  
CEA / DRF / JOLIOT / NeuroSpin  
CEA Centre de Saclay  
Bâtiment 145 - Point Courrier 156  
91191 Gif-sur-Yvette CEDEX, France  
[sebastien.meriaux@cea.fr](mailto:sebastien.meriaux@cea.fr)

**\*\*Co-corresponding author:** Dr Nuno Sousa  
School of Medicine  
Life and Health Sciences Research Institute (ICVS)  
University of Minho  
4710-057 Braga, Portugal  
[njcsousa@med.uminho.pt](mailto:njcsousa@med.uminho.pt)

**†These authors contributed equally to this work**

## Supplementary Information

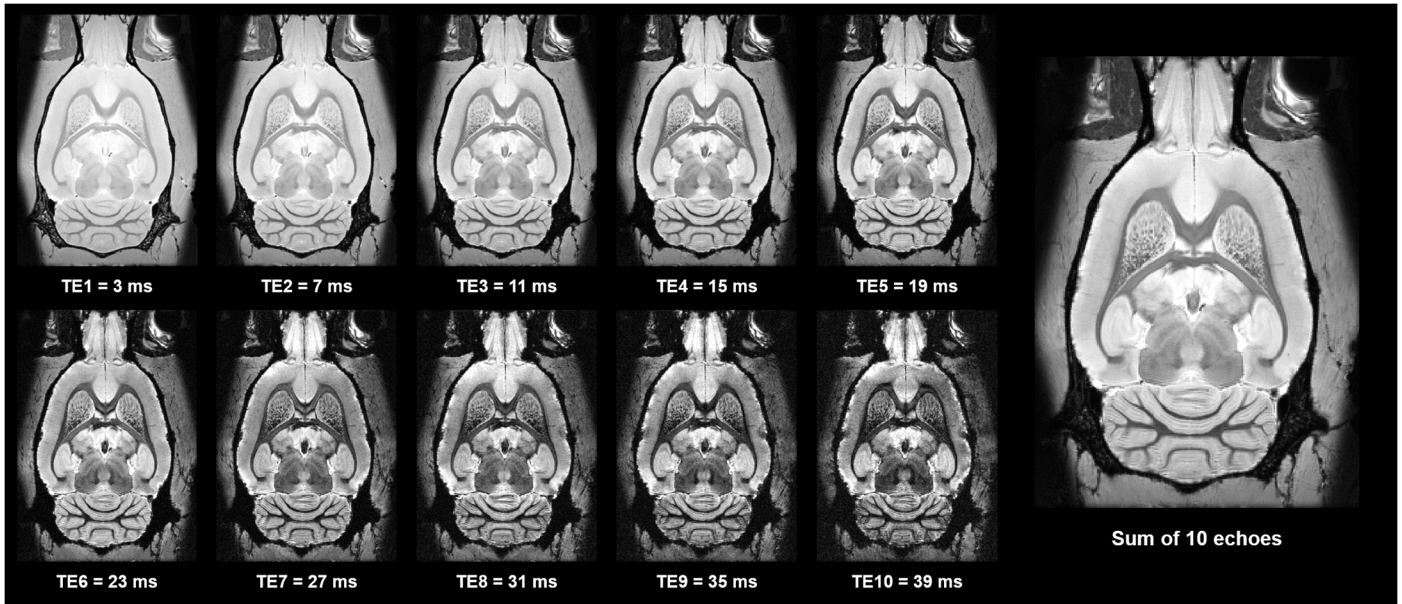

**Supplementary Figure 1:** Example of an *ex vivo* Multiple Gradient Echo acquisition used to build the SIGMA anatomical template of rat brain (TR = 100 ms, 10 echoes spaced by 4 ms from 3 ms to 39 ms, spatial resolution =  $90 \times 90 \times 180 \mu\text{m}^3$ , 16 averages, acquisition time = 8 h 32 min).

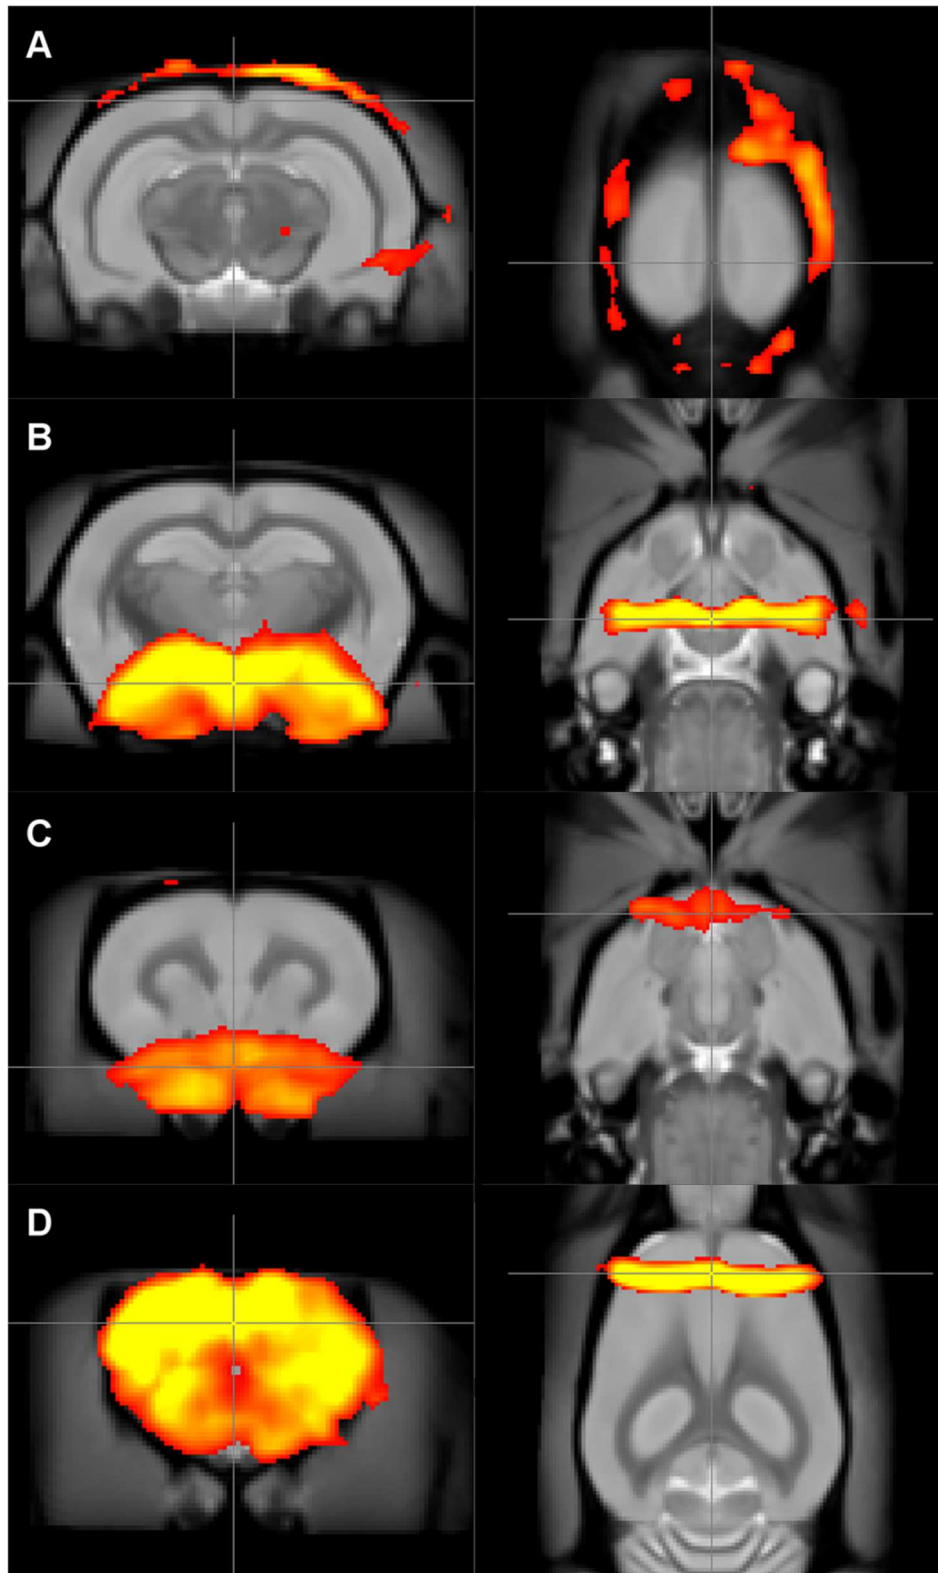

**Supplementary Figure 2:** Several examples of artefact found through ICA decomposition (left column = coronal slices, right column = axial slices). **(A)** Movement artefact component, **(B and C)** ghosting artefact components, **(D)** antenna channels crosstalk artefact.

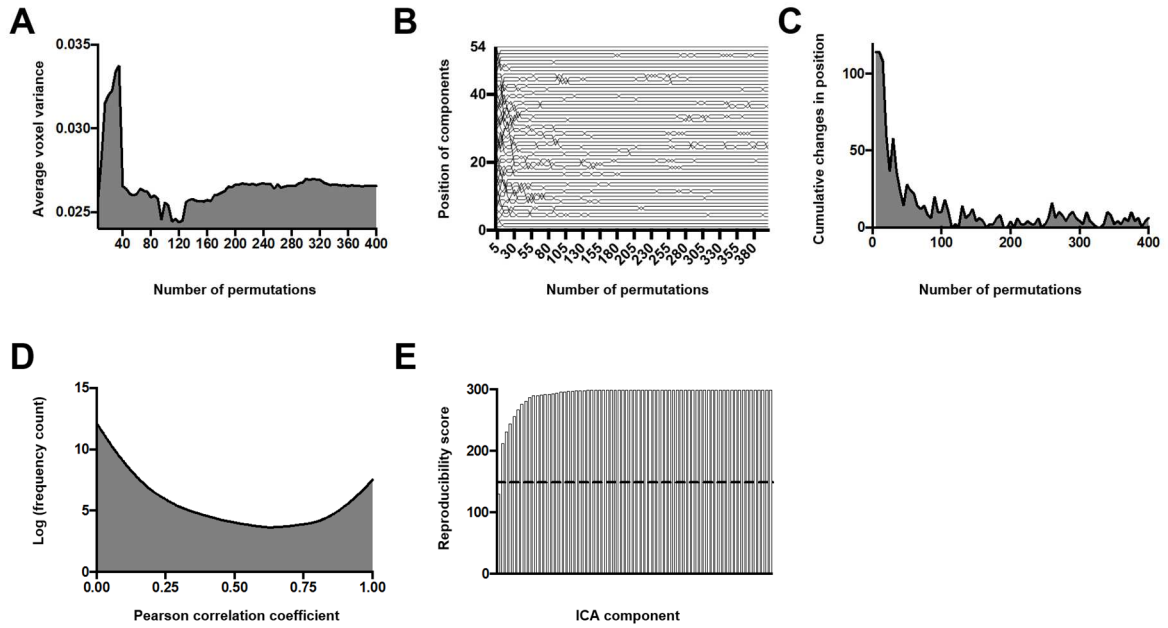

**Supplementary Figure 3:** Impact of the number of permutations upon the reproducibility of ICA maps. **(A)** Average voxel variance across the grouped maps for each number of permutations used. **(B)** Rank of the reproducibility of each component across each number of permutations. **(C)** Cumulative changes in rank position calculated as the sum of the absolute differences between  $i$  and  $i-1$  permutation. **(D)** Logarithmic distribution of the correlation distribution of all possible pairs for  $N = 300$  permutations. **(E)** Reproducibility of all the components, ordered by reproducibility. In **E**, the dashed line indicates the cut-off threshold, equal to half of the maximum reproducibility found. Source data are provided as a Source Data file.

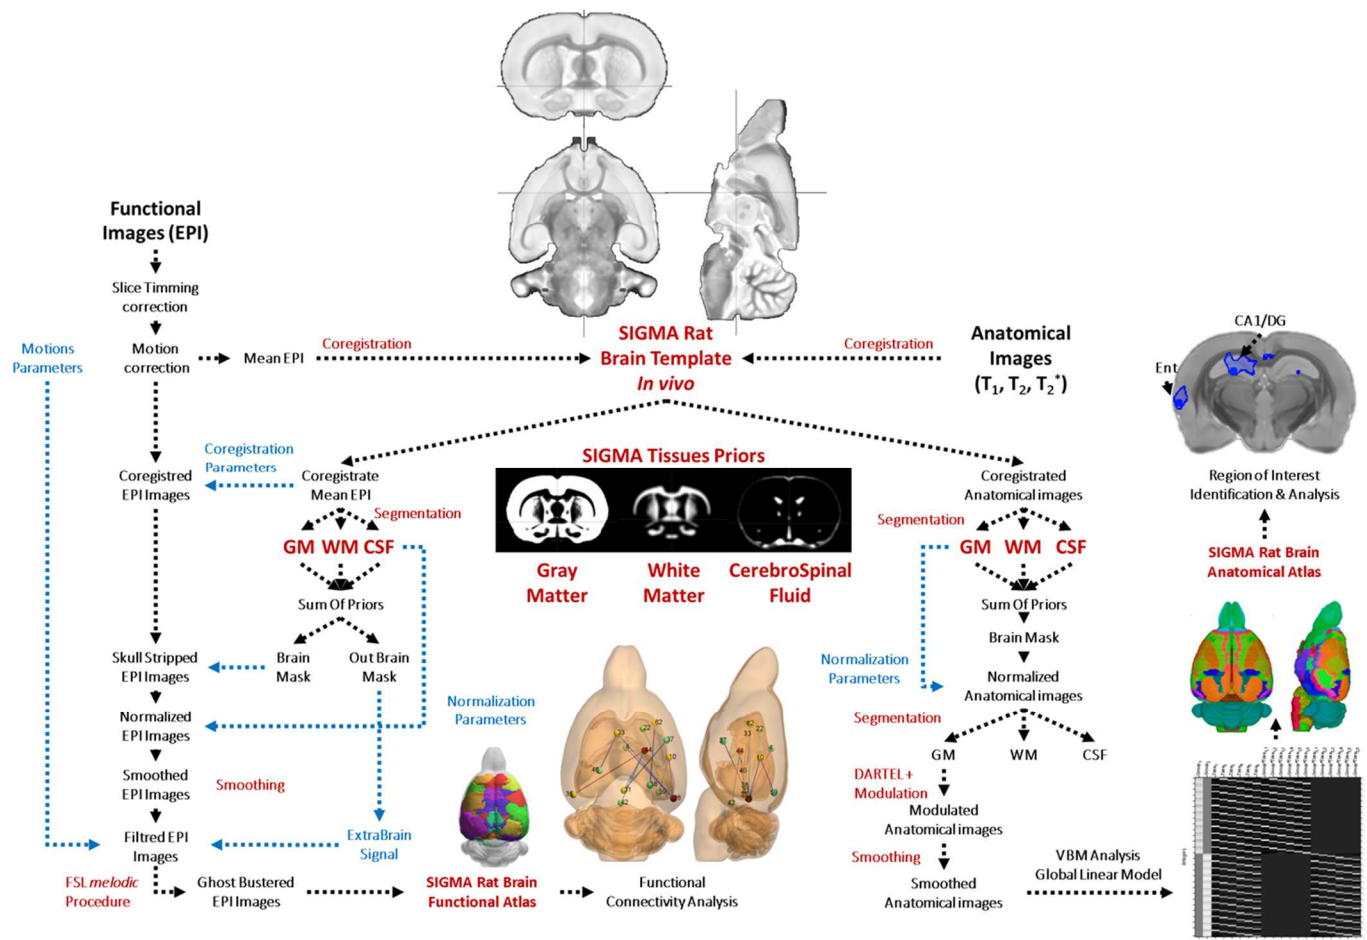

**Supplementary Figure 4:** The power of the integrated analysis in functional and morphological MRI investigation in rat. The SIGMA resources offer to the preclinical neuroimaging community a complete set of *in vivo* and *ex vivo* templates, tissues priors as well as functional and anatomical atlases of the rat brain. This new set of resources allows both linear and non-linear coregistration of multimodal acquisitions performed on the same animal (functional, anatomical and diffusion), leading to an accurate identification of the brain territories involved in a physiological or pathophysiological process. Therefore, the SIGMA resources pave the way for standardization in preclinical research, but also for multicentric preclinical studies needed to increase their significance.

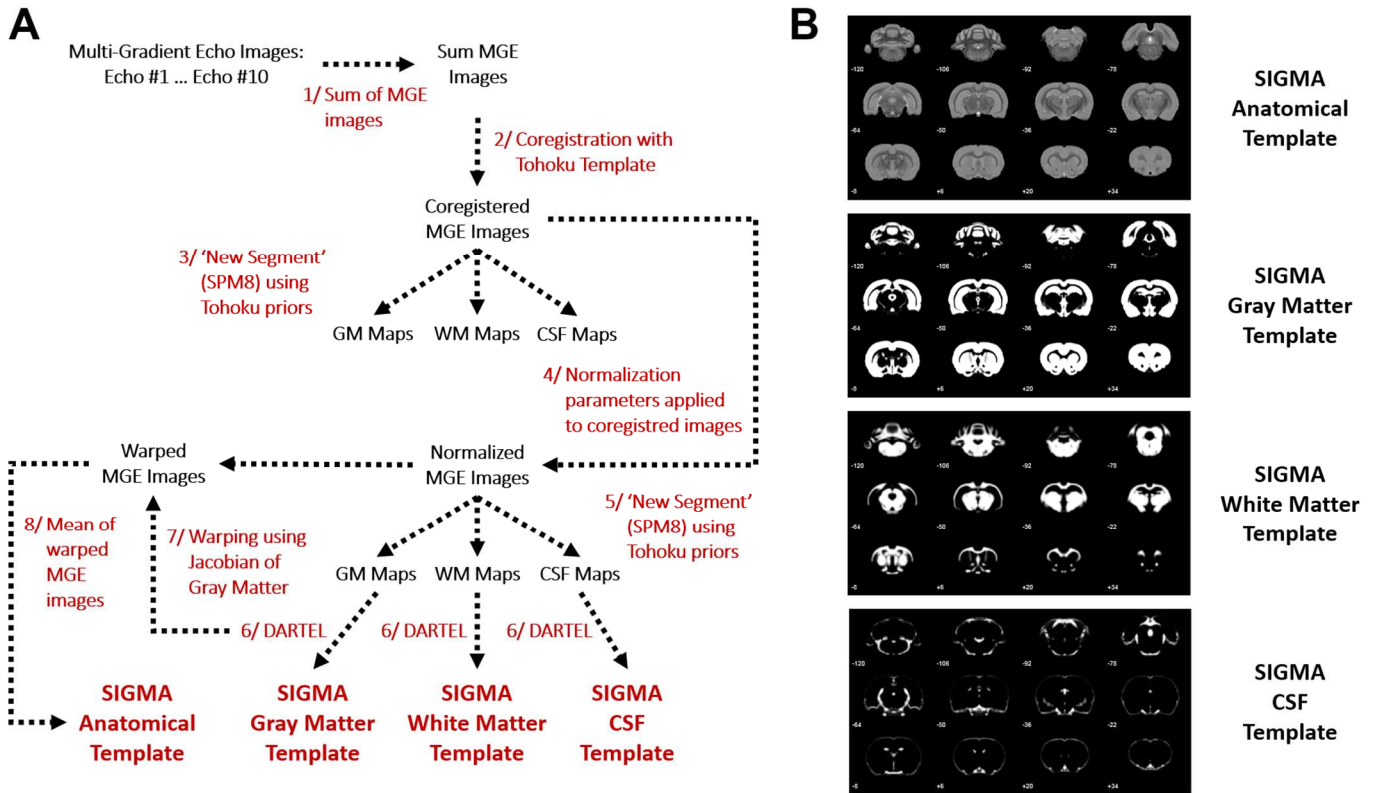

**Supplementary Figure 5:** (A) Schematic workflow used for the creation of (B) the *ex vivo* SIGMA anatomical template of rat brain and the corresponding Gray Matter (GM), White Matter (WM) and Cerebrospinal Fluid (CSF) probability maps.

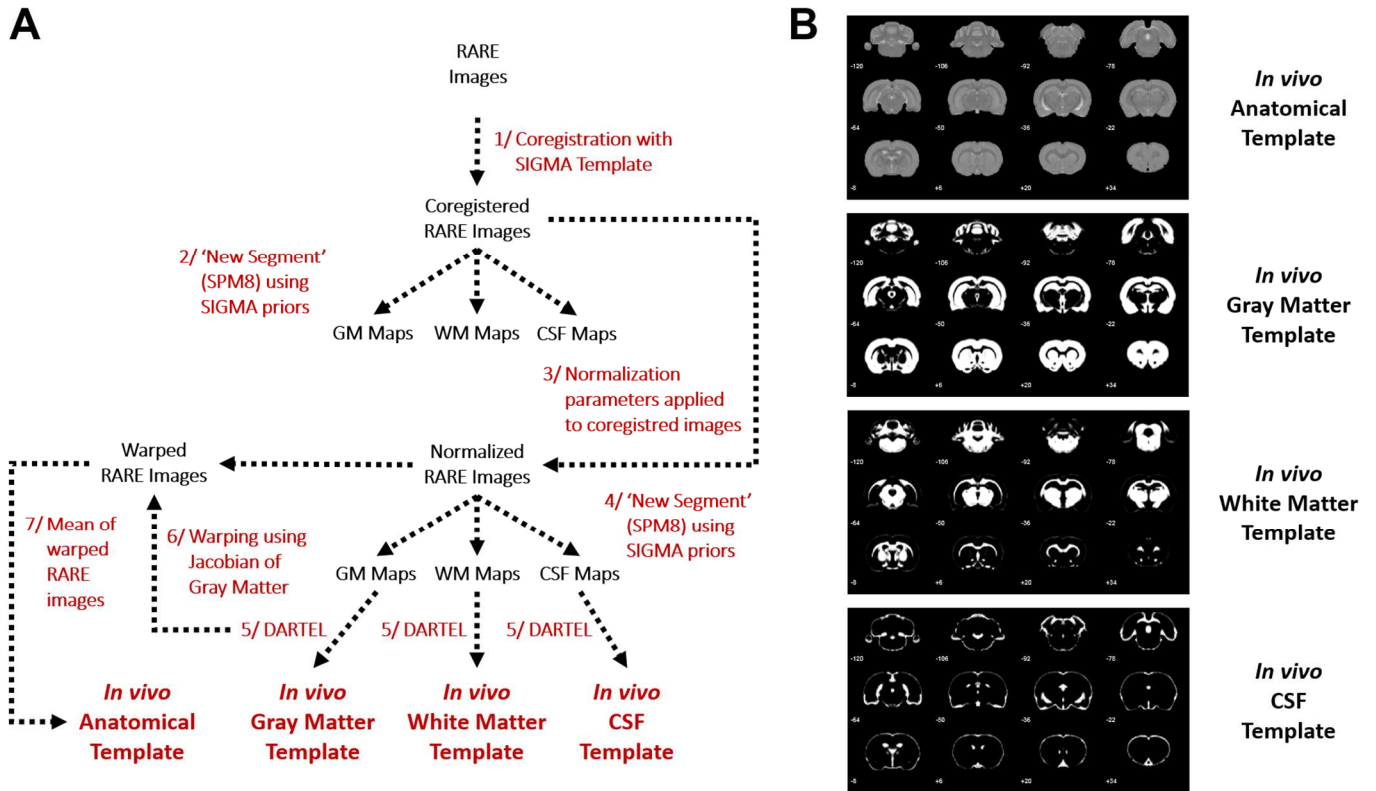

**Supplementary Figure 6:** (A) Schematic workflow used for the creation of (B) the *in vivo* anatomical template of rat brain and the corresponding Gray Matter (GM), White Matter (WM) and Cerebrospinal Fluid (CSF) probability maps.

**Supplementary Table 1:** Listing of anatomical regions of interest from the SIGMA anatomical atlas.



| Original Atlas | Left Hemisphere Label | Right Hemisphere Label | Matters      | Territories    | Systems                       | Regions of interest                                  |
|----------------|-----------------------|------------------------|--------------|----------------|-------------------------------|------------------------------------------------------|
| SIGMA          | 1171                  | 1172                   | CSF          | CSF            | CSF                           | Ventricular System                                   |
| Waxholm        | 171                   | 172                    | Grey Matter  | Basal ganglia  | Pallidum                      | Globus Pallidus                                      |
| Waxholm        | 731                   | 732                    | Grey Matter  | Basal ganglia  | Striatal System               | Striatum                                             |
| Waxholm        | 221                   | 222                    | Grey Matter  | Cerebellum     | Sensory-Motor                 | Granule Cell Level of the Cerebellum                 |
| Waxholm        | 341                   | 342                    | Grey Matter  | Cerebellum     | Sensory-Motor                 | Molecular Layer of the Cerebellum                    |
| Tohoku         | 31                    | 32                     | Grey Matter  | Cortex         | Amygdala                      | Amygdalohippocampic Area                             |
| Tohoku         | 41                    | 42                     | Grey Matter  | Cortex         | Amygdala                      | Amygdalopiriform Cortex                              |
| Tohoku         | 491                   | 492                    | Grey Matter  | Cortex         | Auditory System               | Primary Auditory Cortex                              |
| Tohoku         | 681                   | 682                    | Grey Matter  | Cortex         | Auditory System               | Secondary Auditory Cortex Dorsal Part                |
| Tohoku         | 691                   | 692                    | Grey Matter  | Cortex         | Auditory System               | Secondary Auditory Cortex Ventral Part               |
| SIGMA          | 211                   | 212                    | Grey Matter  | Cortex         | Auditory System               | Lateral Primary Auditory Cortex                      |
| Tohoku         | 501                   | 502                    | Grey Matter  | Cortex         | Cingular System               | Primary Cingular Cortex                              |
| Tohoku         | 701                   | 702                    | Grey Matter  | Cortex         | Cingular System               | Secondary Cingular Cortex                            |
| Waxholm        | 71                    | 72                     | Grey Matter  | Cortex         | Hippocampus Fomation          | Cornu Ammonis 1                                      |
| Waxholm        | 81                    | 82                     | Grey Matter  | Cortex         | Hippocampus Fomation          | Cornu Ammonis 2                                      |
| Waxholm        | 91                    | 92                     | Grey Matter  | Cortex         | Hippocampus Fomation          | Cornu Ammonis 3                                      |
| Waxholm        | 101                   | 102                    | Grey Matter  | Cortex         | Hippocampus Fomation          | Dentate Gyrus                                        |
| Waxholm        | 151                   | 152                    | Grey Matter  | Cortex         | Hippocampus Fomation          | Fasciola Cinereum                                    |
| Waxholm        | 371                   | 372                    | Grey Matter  | Cortex         | Hippocampus Fomation          | Parasubiculum                                        |
| Waxholm        | 471                   | 472                    | Grey Matter  | Cortex         | Hippocampus Fomation          | Presubiculum                                         |
| Waxholm        | 741                   | 742                    | Grey Matter  | Cortex         | Hippocampus Fomation          | Subiculum                                            |
| Tohoku         | 11                    | 12                     | Grey Matter  | Cortex         | Insular System                | Agranular Dysgranular Insular Cortex                 |
| Tohoku         | 21                    | 22                     | Grey Matter  | Cortex         | Insular System                | Agranular Insular Cortex                             |
| Tohoku         | 121                   | 122                    | Grey Matter  | Cortex         | Insular System                | Dysgranular Insular Cortex                           |
| Tohoku         | 451                   | 452                    | Grey Matter  | Cortex         | Insular System                | Posterior Agranular Insular Cortex                   |
| Tohoku         | 111                   | 112                    | Grey Matter  | Cortex         | Limbic System                 | Dorso Lateral Orbital Cortex                         |
| Tohoku         | 161                   | 162                    | Grey Matter  | Cortex         | Limbic System                 | Frontal Association Cortex                           |
| SIGMA          | 361                   | 362                    | Grey Matter  | Cortex         | Limbic System                 | Orbitofrontal Region                                 |
| SIGMA          | 461                   | 462                    | Grey Matter  | Cortex         | Limbic System                 | PreLimbic System                                     |
| Tohoku         | 511                   | 512                    | Grey Matter  | Cortex         | Motor System                  | Primary Motor Cortex                                 |
| Tohoku         | 711                   | 712                    | Grey Matter  | Cortex         | Motor System                  | Secondary Motor Cortex                               |
| Waxholm        | 141                   | 142                    | Grey Matter  | Cortex         | Olfactory System              | Entorhinal Cortex                                    |
| Tohoku         | 251                   | 252                    | Grey Matter  | Cortex         | Olfactory System              | Lateral Entorhinal Cortex Internal part              |
| Tohoku         | 261                   | 262                    | Grey Matter  | Cortex         | Olfactory System              | Lateral Entorhinal Cortex                            |
| Tohoku         | 271                   | 272                    | Grey Matter  | Cortex         | Olfactory System              | Lateral Entorhinal Cortex external part              |
| Tohoku         | 301                   | 302                    | Grey Matter  | Cortex         | Olfactory System              | Medial Entorhinal Cortex                             |
| Waxholm        | 421                   | 422                    | Grey Matter  | Cortex         | Olfactory System              | Perirhinal Area 35                                   |
| Waxholm        | 431                   | 432                    | Grey Matter  | Cortex         | Olfactory System              | Perirhinal Area 36                                   |
| Tohoku         | 441                   | 442                    | Grey Matter  | Cortex         | Olfactory System              | Perirhinal Cortex                                    |
| Tohoku         | 281                   | 282                    | Grey Matter  | Cortex         | Parietal System               | Lateral Parietal Associative Cortex                  |
| Tohoku         | 311                   | 312                    | Grey Matter  | Cortex         | Parietal System               | Medial Parietal Associative Cortex                   |
| Tohoku         | 381                   | 382                    | Grey Matter  | Cortex         | Parietal System               | Parietal Cortex Postero Caudal Part                  |
| Tohoku         | 391                   | 392                    | Grey Matter  | Cortex         | Parietal System               | Parietal Cortex Postero Dorsal Part                  |
| Tohoku         | 401                   | 402                    | Grey Matter  | Cortex         | Parietal System               | Parietal Cortex Postero Rostral                      |
| Tohoku         | 651                   | 652                    | Grey Matter  | Cortex         | Retrosplenial System          | Retrosplenial Dysgranular Cortex                     |
| Tohoku         | 661                   | 662                    | Grey Matter  | Cortex         | Retrosplenial System          | Retrosplenial Granular Cortex Part A                 |
| Tohoku         | 671                   | 672                    | Grey Matter  | Cortex         | Retrosplenial System          | Retrosplenial Granular Cortex Part B                 |
| Tohoku         | 521                   | 522                    | Grey Matter  | Cortex         | Somatosensory System          | Primary Somatosensory Cortex Barrel field            |
| Tohoku         | 531                   | 532                    | Grey Matter  | Cortex         | Somatosensory System          | Primary Somatosensory Cortex Dysgranular             |
| Tohoku         | 541                   | 542                    | Grey Matter  | Cortex         | Somatosensory System          | Primary Somatosensory Cortex Dysgranular Zone 0      |
| Tohoku         | 551                   | 552                    | Grey Matter  | Cortex         | Somatosensory System          | Primary Somatosensory Cortex Forelimb                |
| Tohoku         | 561                   | 562                    | Grey Matter  | Cortex         | Somatosensory System          | Primary Somatosensory Cortex Hindlimb                |
| Tohoku         | 571                   | 572                    | Grey Matter  | Cortex         | Somatosensory System          | Primary Somatosensory Cortex Jaw                     |
| Tohoku         | 581                   | 582                    | Grey Matter  | Cortex         | Somatosensory System          | Primary Somatosensory Cortex                         |
| Tohoku         | 591                   | 592                    | Grey Matter  | Cortex         | Somatosensory System          | Primary Somatosensory Cortex Shoulder                |
| Tohoku         | 601                   | 602                    | Grey Matter  | Cortex         | Somatosensory System          | Primary Somatosensory Cortex Trunk                   |
| Tohoku         | 611                   | 612                    | Grey Matter  | Cortex         | Somatosensory System          | Primary Somatosensory Cortex Upperlips               |
| Tohoku         | 721                   | 722                    | Grey Matter  | Cortex         | Somatosensory System          | Secondary Somatosensory Cortex                       |
| Tohoku         | 131                   | 132                    | Grey Matter  | Cortex         | Temporal System               | Ectorhinal Cortex                                    |
| SIGMA          | 201                   | 202                    | Grey Matter  | Cortex         | Temporal System               | Lateral Temporal Associative Cortex                  |
| Tohoku         | 771                   | 772                    | Grey Matter  | Cortex         | Temporal System               | Temporal Associative Cortex                          |
| Tohoku         | 291                   | 292                    | Grey Matter  | Cortex         | Visual System                 | Lateral Secondary Visual Cortex                      |
| Tohoku         | 321                   | 322                    | Grey Matter  | Cortex         | Visual System                 | Medio Lateral Secondary Visual Cortex                |
| Tohoku         | 331                   | 332                    | Grey Matter  | Cortex         | Visual System                 | Medio Medial Secondary Visual Cortex                 |
| Tohoku         | 621                   | 622                    | Grey Matter  | Cortex         | Visual System                 | Primary Visual Cortex Binocular Area                 |
| Tohoku         | 631                   | 632                    | Grey Matter  | Cortex         | Visual System                 | Primary Visual Cortex                                |
| Tohoku         | 641                   | 642                    | Grey Matter  | Cortex         | Visual System                 | Primary Visual Cortex Monocular Area                 |
| Waxholm        | 61                    | 62                     | Grey Matter  | Diencephalon   | Thalamus                      | Bed Nucleus of the Stria Terminalis                  |
| Waxholm        | 231                   | 232                    | Grey Matter  | Diencephalon   | Hypothalamus                  | Hypothalamic Region                                  |
| Waxholm        | 411                   | 412                    | Grey Matter  | Diencephalon   | Tegmentum                     | Periaqueductal Gray                                  |
| Waxholm        | 481                   | 482                    | Grey Matter  | Diencephalon   | Visual System                 | Pretectal Region                                     |
| Waxholm        | 971                   | 972                    | Grey Matter  | Diencephalon   | Medulla                       | External Cortex of the Inferior Colliculus           |
| Waxholm        | 1061                  | 1062                   | Grey Matter  | Diencephalon   | Septum                        | Septal Region                                        |
| Waxholm        | 51                    | 52                     | Grey Matter  | Forebrain      | Forebrain                     | Basal Forebrain Region                               |
| SIGMA          | 241                   | 242                    | Grey Matter  | Mesencephalon  | Tegmentum                     | Interpeduncular Nucleus                              |
| Waxholm        | 751                   | 752                    | Grey Matter  | Mesencephalon  | Tegmentum                     | Substantia Nigra                                     |
| Waxholm        | 761                   | 762                    | Grey Matter  | Mesencephalon  | Colliculi                     | Superficial Gray Layer of the Superior Colliculus    |
| Waxholm        | 181                   | 182                    | Grey Matter  | Olfactive Bulb | Olfactory System              | Glomerular Layer of the Accessory Olfactory Bulb     |
| Waxholm        | 191                   | 192                    | Grey Matter  | Olfactive Bulb | Olfactory System              | Glomerular Layer of the Olfactory Bulb               |
| Waxholm        | 351                   | 352                    | Grey Matter  | Olfactive Bulb | Olfactory System              | Olfactory Bulb                                       |
| Waxholm        | 801                   | 802                    | White Matter | Basal ganglia  | Inter Hemispheric Commissures | Anterior Commissure anterior part                    |
| Waxholm        | 811                   | 812                    | White Matter | Basal ganglia  | Inter Hemispheric Commissures | Anterior Commissure posterior part                   |
| Waxholm        | 1091                  | 1092                   | White Matter | Basal ganglia  | Inter Hemispheric Commissures | Dorsal Fornix                                        |
| Waxholm        | 821                   | 822                    | White Matter | Brainstem      | Sensory System                | Ascending Fibers of the Facial Nerve                 |
| Waxholm        | 841                   | 842                    | White Matter | Brainstem      | Medulla                       | Brainstem                                            |
| Waxholm        | 851                   | 852                    | White Matter | Brainstem      | Medulla                       | Central Canal                                        |
| Waxholm        | 921                   | 922                    | White Matter | Brainstem      | Sensory System                | Genu of the Facial Nerve                             |
| Waxholm        | 1031                  | 1032                   | White Matter | Brainstem      | Medulla                       | Inferior Olive/PyramidalDecusation/SP5               |
| Waxholm        | 1041                  | 1042                   | White Matter | Brainstem      | Medulla                       | Posterior Commissure                                 |
| Waxholm        | 1101                  | 1102                   | White Matter | Brainstem      | Medulla                       | Fimbria of the Hippocampus part 1                    |
| Waxholm        | 1161                  | 1162                   | White Matter | Brainstem      | Medulla                       | Periventricular Grey                                 |
| Waxholm        | 991                   | 992                    | White Matter | Cerebellum     | Spinocerebellar Pathway       | Medial Lemniscus Decussation                         |
| Waxholm        | 1001                  | 1002                   | White Matter | Cerebellum     | Spinocerebellar Pathway       | Medial Lemniscus                                     |
| Waxholm        | 1011                  | 1012                   | White Matter | Cerebellum     | Somatosensory System          | Middle Cerebellar Peduncle                           |
| Waxholm        | 1051                  | 1052                   | White Matter | Cerebellum     | Cerebellopontine Pathway      | Pyramidal tract                                      |
| Waxholm        | 781                   | 782                    | White Matter | Cortex         | Hippocampus Fomation          | Fimbria of the Hippocampus part 2                    |
| Waxholm        | 941                   | 942                    | White Matter | Cortex         | Hippocampus Fomation          | Fimbria of the Hippocampus part 3                    |
| Waxholm        | 961                   | 962                    | White Matter | Cortex         | Inter Hemispheric Commissures | Inferior Cerebellar Peduncle/Spinal Trigeminal Tract |
| Waxholm        | 861                   | 862                    | White Matter | Diencephalon   | Thalamus                      | Commissural Stria Terminalis                         |

|         |      |      |                             |                               |                                                         |
|---------|------|------|-----------------------------|-------------------------------|---------------------------------------------------------|
| Waxholm | 951  | 952  | White Matter Diencephalon   | Thalamus                      | Fornix                                                  |
| Waxholm | 981  | 982  | White Matter Diencephalon   | Inter Hemispheric Commissures | Mammillothalamic Tract                                  |
| Waxholm | 1021 | 1022 | White Matter Diencephalon   | Thalamus                      | Optic Tract and Optic Chiasm                            |
| Waxholm | 1071 | 1072 | White Matter Diencephalon   | Sensory System                | Spinal Cord                                             |
| Waxholm | 1111 | 1112 | White Matter Diencephalon   | Thalamus                      | Subthalamic Nucleus                                     |
| Waxholm | 1131 | 1132 | White Matter Diencephalon   | Thalamus                      | Thalamus                                                |
| Waxholm | 1141 | 1142 | White Matter Diencephalon   | Pons                          | Brachium Pontis                                         |
| Waxholm | 1151 | 1152 | White Matter Diencephalon   | Thalamus                      | Ventral Hippocampal Commissure                          |
| Waxholm | 891  | 892  | White Matter Fiber tract    | Corpus Callosum               | Corpus Callosum and Associated Subcortical White Matter |
| Waxholm | 911  | 912  | White Matter Fiber tract    | Internal Capsule              | Descending Corticofugal Pathways and Globus Pallidum    |
| Waxholm | 931  | 932  | White Matter Fiber tract    | Thalamus                      | Fasciculus Retroflexus                                  |
| Waxholm | 831  | 832  | White Matter Mesencephalon  | Colliculi                     | Brachium of the Superior Colliculus                     |
| Waxholm | 871  | 872  | White Matter Mesencephalon  | Colliculi                     | Commissure of the Inferior Colliculus                   |
| Waxholm | 881  | 882  | White Matter Mesencephalon  | Colliculi                     | Commissure of the Superior Colliculus                   |
| Waxholm | 901  | 902  | White Matter Mesencephalon  | Inter Hemispheric Commissures | Deeper Layers of the Superior Colliculus                |
| Waxholm | 1081 | 1082 | White Matter Mesencephalon  | Medulla                       | SP5                                                     |
| Waxholm | 791  | 792  | White Matter Olfactory Bulb | Inter Hemispheric Commissures | Anterior Commissure Intraulbar part                     |
| Waxholm | 1121 | 1122 | White Matter Spinal Cord    | Fiber tract                   | Optic Pathways                                          |

**Supplementary Table 2:** Effect of the normalization procedure onto the volumes of both Tohoku and Waxholm regions of interest observed when building the SIGMA anatomical atlas.

| Atlas  | ROI Names                                               | ROI volumes before normalization (μL) | ROI volumes after normalization (μL) | Variation (%) |
|--------|---------------------------------------------------------|---------------------------------------|--------------------------------------|---------------|
| WHS    | anterior commissure, anterior part                      | 2.00                                  | 2.01                                 | 0.50          |
| WHS    | anterior commissure, intrabulbar part                   | 2.00                                  | 2.71                                 | 35.30         |
| WHS    | anterior commissure, posterior part                     | 1.00                                  | 0.39                                 | -61.20        |
| WHS    | ascending fibers of the facial nerve                    | 1.00                                  | 0.19                                 | -81.40        |
| WHS    | basal forebrain region                                  | 80.00                                 | 81.63                                | 2.03          |
| WHS    | bed nucleus of the stria terminalis                     | 2.00                                  | 2.62                                 | 30.90         |
| WHS    | brachium of the superior colliculus                     | 1.00                                  | 0.39                                 | -61.20        |
| WHS    | brain stem                                              | 209.00                                | 228.80                               | 9.47          |
| WHS    | central canal                                           | 1.00                                  | 0.22                                 | -77.60        |
| WHS    | commissural stria terminalis                            | 1.00                                  | 1.00                                 | 0.00          |
| WHS    | commissure of the inferior colliculus                   | 6.00                                  | 6.93                                 | 15.55         |
| WHS    | commissure of the superior colliculus                   | 0.16                                  | 0.18                                 | 15.00         |
| WHS    | cornu ammonis 1                                         | 27.00                                 | 33.54                                | 24.21         |
| WHS    | cornu ammonis 2                                         | 5.00                                  | 5.38                                 | 7.60          |
| WHS    | cornu ammonis 3                                         | 32.00                                 | 29.90                                | -6.55         |
| WHS    | corpus callosum and associated subcortical white matter | 79.00                                 | 80.74                                | 2.20          |
| WHS    | corticofugal pathways                                   | 30.00                                 | 43.67                                | 45.57         |
| WHS    | deeper layers of the superior colliculus                | 24.00                                 | 30.59                                | 27.48         |
| WHS    | dentate gyrus                                           | 32.00                                 | 46.79                                | 46.23         |
| WHS    | entorhinal cortex                                       | 24.00                                 | 19.86                                | -17.25        |
| WHS    | fasciculus retroflexus                                  | 1.00                                  | 0.19                                 | -81.20        |
| WHS    | fasciola cinereum                                       | 3.00                                  | 3.71                                 | 23.57         |
| WHS    | fimbria of the hippocampus                              | 11.00                                 | 4.82                                 | -56.21        |
| WHS    | fornix                                                  | 3.00                                  | 3.59                                 | 19.53         |
| WHS    | genu of the facial nerve                                | 1.00                                  | 0.49                                 | -51.40        |
| WHS    | globus pallidus                                         | 0.20                                  | 0.18                                 | -9.00         |
| WHS    | glomerular layer of the accessory olfactory bulb        | 2.00                                  | 0.82                                 | -59.00        |
| WHS    | glomerular layer of the olfactory bulb                  | 20.00                                 | 28.28                                | 41.40         |
| WHS    | hypothalamic region                                     | 24.00                                 | 31.42                                | 30.90         |
| WHS    | inferior cerebellar peduncle                            | 60.00                                 | 18.70                                | -68.84        |
| WHS    | inferior olive                                          | 20.00                                 | 13.25                                | -33.76        |
| WHS    | interpeduncular nucleus                                 | 10.00                                 | 3.82                                 | -61.80        |
| WHS    | mammillothalamic tract                                  | 1.00                                  | 1.28                                 | 28.40         |
| WHS    | medial lemniscus                                        | 2.00                                  | 1.35                                 | -32.30        |
| WHS    | medial lemniscus decussation                            | 1.00                                  | 0.13                                 | -86.60        |
| WHS    | middle cerebellar peduncle                              | 10.00                                 | 10.44                                | 4.36          |
| WHS    | molecular cell layer of the cerebellum                  | 166.00                                | 262.77                               | 58.30         |
| WHS    | olfactory bulb                                          | 122.00                                | 112.15                               | -8.08         |
| WHS    | optic tract and optic chiasm                            | 6.00                                  | 9.21                                 | 53.47         |
| WHS    | parasubiculum                                           | 8.00                                  | 10.90                                | 36.20         |
| WHS    | periaqueductal gray                                     | 17.00                                 | 25.36                                | 49.18         |
| WHS    | perirhinal area 35                                      | 6.00                                  | 6.91                                 | 15.10         |
| WHS    | perirhinal area 36                                      | 9.00                                  | 14.79                                | 64.31         |
| WHS    | periventricular gray                                    | 13.00                                 | 11.85                                | -8.82         |
| WHS    | posterior commissure                                    | 1.00                                  | 0.32                                 | -68.00        |
| WHS    | presubiculum                                            | 9.00                                  | 1.34                                 | -85.09        |
| WHS    | pretectal region                                        | 8.00                                  | 2.32                                 | -71.03        |
| WHS    | pyramidal decussation                                   | 1.00                                  | 0.26                                 | -74.00        |
| WHS    | septal region                                           | 12.00                                 | 11.25                                | -6.23         |
| WHS    | striatum                                                | 111.00                                | 102.85                               | -7.34         |
| WHS    | subiculum                                               | 17.00                                 | 17.29                                | 1.69          |
| WHS    | substantia nigra                                        | 7.00                                  | 4.05                                 | -42.20        |
| WHS    | subthalamic nucleus                                     | 1.00                                  | 0.28                                 | -71.80        |
| WHS    | superficial gray layer of the superior colliculus       | 7.00                                  | 10.25                                | 46.49         |
| WHS    | thalamus                                                | 86.00                                 | 60.80                                | -29.31        |
| WHS    | ventral hippocampal commissure                          | 1.00                                  | 0.92                                 | -7.80         |
| Tohoku | AIP                                                     | 7.73                                  | 8.66                                 | 12.11         |
| Tohoku | APir                                                    | 13.04                                 | 1.74                                 | -86.68        |
| Tohoku | Au1                                                     | 20.08                                 | 28.78                                | 43.30         |
| Tohoku | AUD                                                     | 8.93                                  | 12.91                                | 44.65         |
| Tohoku | AuV                                                     | 6.38                                  | 8.49                                 | 33.06         |
| Tohoku | Cg1                                                     | 24.91                                 | 34.80                                | 39.73         |
| Tohoku | Cg2                                                     | 7.65                                  | 9.83                                 | 28.41         |
| Tohoku | DI                                                      | 8.99                                  | 14.25                                | 58.57         |
| Tohoku | DIEnt                                                   | 6.98                                  | 7.86                                 | 12.58         |
| Tohoku | DLEnt                                                   | 20.11                                 | 2.37                                 | -88.22        |
| Tohoku | DLO                                                     | 4.87                                  | 6.19                                 | 27.03         |
| Tohoku | Ect                                                     | 18.64                                 | 21.69                                | 16.38         |
| Tohoku | Fr3                                                     | 9.60                                  | 5.68                                 | -40.85        |

|        |       |       |       |        |
|--------|-------|-------|-------|--------|
| Tohoku | LPtA  | 8.23  | 11.39 | 38.38  |
| Tohoku | M1    | 43.33 | 47.48 | 9.56   |
| Tohoku | M2    | 24.08 | 22.76 | -5.46  |
| Tohoku | MEnt  | 6.29  | 4.73  | -24.71 |
| Tohoku | MPtA  | 3.25  | 4.18  | 28.62  |
| Tohoku | PRh   | 1.43  | 2.18  | 51.88  |
| Tohoku | PtPC  | 19.00 | 6.64  | -65.05 |
| Tohoku | PtPD  | 4.78  | 0.30  | -93.76 |
| Tohoku | PtPR  | 1.35  | 2.01  | 49.26  |
| Tohoku | RSD   | 22.77 | 38.12 | 67.42  |
| Tohoku | RSGa  | 3.01  | 5.15  | 70.96  |
| Tohoku | RSGb  | 4.98  | 7.46  | 49.73  |
| Tohoku | S1    | 1.98  | 2.77  | 39.82  |
| Tohoku | S1BF  | 36.77 | 44.65 | 21.42  |
| Tohoku | S1DZ  | 13.29 | 16.63 | 25.11  |
| Tohoku | S1DZ0 | 4.30  | 6.63  | 54.29  |
| Tohoku | S1FL  | 19.62 | 23.87 | 21.66  |
| Tohoku | S1HL  | 9.43  | 11.40 | 20.92  |
| Tohoku | S1J   | 8.10  | 11.58 | 42.99  |
| Tohoku | S1Sh  | 0.53  | 0.67  | 26.42  |
| Tohoku | S1Tr  | 2.99  | 3.96  | 32.60  |
| Tohoku | S1ULp | 22.69 | 32.67 | 43.98  |
| Tohoku | S2    | 9.59  | 13.79 | 43.71  |
| Tohoku | TeA   | 6.45  | 8.49  | 31.55  |
| Tohoku | V1    | 9.05  | 12.54 | 38.67  |
| Tohoku | V1B   | 17.14 | 25.26 | 47.36  |
| Tohoku | V1M   | 10.02 | 15.76 | 57.30  |
| Tohoku | V2L   | 8.63  | 12.35 | 43.18  |
| Tohoku | V2ML  | 6.00  | 8.28  | 38.06  |
| Tohoku | V2MM  | 2.22  | 3.11  | 39.66  |

**Global mean of volume variations (%)** + 3.59

**Mean of absolute volume variations (%)** 38.54

**Standard deviation of absolute volume variations (%)** 24.04

**Supplementary Table 3:** Listing of functional regions of interest from the SIGMA functional atlas.

| Label | Hemisphere        | Territories   | System               | Region of interest                                 |
|-------|-------------------|---------------|----------------------|----------------------------------------------------|
| 7     | Inter hemispheric | Basal ganglia | Striatal system      | Accumbens Shell                                    |
| 13    | Left              | Basal ganglia | Striatal system      | Striatum (Dorsal)                                  |
| 14    | Left              | Basal ganglia | Striatal system      | Striatum (Ventral)                                 |
| 15    | Right             | Basal ganglia | Striatal system      | Striatum                                           |
| 8     | Right             | Cortex        | Motor Cortex         | Primary and Secondary Motor                        |
| 10    | Right             | Cortex        | Amygdala             | Amygdala (Central, Basolateral)                    |
| 1     | Inter hemispheric | Cortex        | Cingular system      | Cingulate Cortex 1                                 |
| 9     | Inter hemispheric | Cortex        | Cingular system      | Cingulate Cortex 2                                 |
| 18    | Inter hemispheric | Cortex        | Cingular system      | Cingulate Cortex 3                                 |
| 23    | Left              | Cortex        | Hippocampus Fomation | Dorsal Hippocampus                                 |
| 32    | Left              | Cortex        | Hippocampus Fomation | Cornu Ammonis 1 (transition dorsal ventral)        |
| 36    | Right             | Cortex        | Hippocampus Fomation | Dorsal Hippocampus                                 |
| 40    | Left              | Cortex        | Hippocampus Fomation | Dorsal Dentate Gyrus                               |
| 48    | Left              | Cortex        | Hippocampus Fomation | Cornu Ammonis 1 (Ventral)                          |
| 44    | Right             | Cortex        | Hippocampus Fomation | Dorsal Dentate Gyrus/Entorhinal Cortex             |
| 6     | Right             | Cortex        | Insular system       | Insular Cortex                                     |
| 17    | Right             | Cortex        | Insular system       | Insular Cortex 2                                   |
| 20    | Left              | Cortex        | Insular system       | Insular Cortex                                     |
| 2     | Inter hemispheric | Cortex        | Limbic System        | Prelimbic Cortex                                   |
| 5     | Inter hemispheric | Cortex        | Limbic System        | Prelimbic/Infralimbic                              |
| 16    | Left              | Cortex        | Olfactory system     | Endo/Piriform Cortex                               |
| 22    | Right             | Cortex        | Olfactory system     | Piriform Cortex                                    |
| 26    | Left              | Cortex        | Olfactory system     | Piriform Cortex                                    |
| 37    | Right             | Cortex        | Olfactory system     | Intermedial Entorhinal cortex                      |
| 25    | Inter hemispheric | Cortex        | Retrosplenial system | Retrosplenial Cortex 1                             |
| 28    | Inter hemispheric | Cortex        | Retrosplenial system | Retrosplenial Granular Cortex c                    |
| 38    | Inter hemispheric | Cortex        | Retrosplenial system | Retrosplenial Cortex 2                             |
| 41    | Inter hemispheric | Cortex        | Retrosplenial system | Retrosplenial Cortex 3/Superior Gray               |
| 45    | Inter hemispheric | Cortex        | Retrosplenial system | Retrosplenial Cortex 4                             |
| 49    | Left              | Cortex        | Retrosplenial system | Retrosplenial Granular Cortex Zone A/Postsubiculum |
| 50    | Right             | Cortex        | Retrosplenial system | Retrosplenial Granular Cortex Zone A/Postsubiculum |
| 51    | Inter hemispheric | Cortex        | Retrosplenial system | Retrosplenial Cortex 5/Colliculus                  |
| 58    | Right             | Cortex        | Retrosplenial system | RSD/RSGa                                           |
| 3     | Right             | Cortex        | Somatosensory system | Primary Somatosensory                              |
| 4     | Left              | Cortex        | Somatosensory system | Primary Somatosensory                              |
| 11    | Right             | Cortex        | Somatosensory system | Primary Somatosensory Cortex (BE)                  |
| 12    | Left              | Cortex        | Somatosensory system | Primary Somatosensory Cortex (BE)                  |
| 24    | Right             | Cortex        | Somatosensory system | Primary Somatosensory Cortex (Auditory)            |
| 29    | Left              | Cortex        | Somatosensory system | Parietal Cortex (Auditory)                         |
| 34    | Right             | Cortex        | Somatosensory system | Parietal Cortex (Auditory)                         |
| 31    | Inter hemispheric | Cortex        | Visual system        | Secondary Visual cortex                            |
| 39    | Left              | Cortex        | Visual system        | Primary and Secondary Visual Cortex                |
| 42    | Right             | Cortex        | Visual system        | Primary and Secondary Visual Cortex                |
| 21    | Inter hemispheric | Diencephalon  | Hypothalamus         | Hypothalamus 1                                     |
| 30    | Inter hemispheric | Diencephalon  | Hypothalamus         | Hypothalamus 2                                     |
| 33    | Inter hemispheric | Diencephalon  | Tegmentum            | Dorsal Lateral Periaqueductal Gray Left            |
| 19    | Right             | Diencephalon  | Thalamus             | Dorsal thalamic nucleus                            |
| 27    | Inter hemispheric | Diencephalon  | Thalamus             | Ventral thalamic                                   |
| 35    | Left              | Hind Brain    | Visual system        | Medial geniculate nucleus                          |
| 43    | Inter hemispheric | Mesencephalon | Tegmentum            | Interpeduncular nucleus                            |
| 46    | Right             | Mesencephalon | Colliculi            | Inferior colliculus/external cortex                |
| 47    | Inter hemispheric | Mesencephalon | Pons                 | Ventral tegmental nucleus                          |
| 52    | Inter hemispheric | Mesencephalon | Pons                 | Pontine nuclei                                     |
| 53    | Inter hemispheric | Mesencephalon | Pons                 | Raphe (pallidum/magnun) nuclei                     |
| 54    | Left              | Mesencephalon | Pons                 | Pontine reticular/subcoeruleus                     |
| 55    | Left              | Mesencephalon | Colliculi            | External colliculus (V1)                           |
| 56    | Right             | Mesencephalon | Pons                 | Subcoeruleum/pontine reticular nucleu              |
| 57    | Right             | Mesencephalon | Colliculi            | Colliculus                                         |
| 59    | Right             | Mesencephalon | Pons                 | Raphe/Median(paramedian) pontine reticular nu      |
